# Supplementary material
Source: PubMed Central journal article supplement (PMC7852454)
Supplement: mmc1.pdf [file mmc1.pdf]

# THE LANCET

## Supplementary appendix

This appendix formed part of the original submission and has been peer reviewed. We post it as supplied by the authors.

Supplement to: Logunov DY, Dolzhikova IV, Shcheblyakov DV, et al. Safety and efficacy of an rAd26 and rAd5 vector-based heterologous prime-boost COVID-19 vaccine: an interim analysis of a randomised controlled phase 3 trial in Russia. *Lancet* 2021; published online Feb 2. [http://dx.doi.org/10.1016/S0140-6736\(21\)00234-8](http://dx.doi.org/10.1016/S0140-6736(21)00234-8).

## Supplementary

### Appendix 1

#### **Vaccine composition per dose (0.5 mL):**

Component I contains:

*Active substance:* recombinant adenovirus serotype 26 particles containing the SARS-CoV-2 protein S gene in the amount of  $(1.0 \pm 0.5) \times 10^{11}$  particles per dose.

*Excipients:* Tris (hydroxymethyl) aminomethane, sodium chloride, sucrose, magnesium chloride hexahydrate, ethylenediaminetetraacetic acid (EDTA) disodium salt dihydrate, polysorbate-80, ethanol 95%, and water for injection.

Component II contains:

*Active substance:* recombinant adenovirus serotype 5 particles containing SARS-CoV-2 protein S gene in the amount of  $(1.0 \pm 0.5) \times 10^{11}$  particles per dose.

*Excipients:* Tris (hydroxymethyl) aminomethane, sodium chloride, sucrose, magnesium chloride hexahydrate, EDTA disodium salt dihydrate, polysorbate-80, ethanol 95%, and water for injection.

#### **Placebo composition per dose (0.5 mL):**

Component I contains:

Tris (hydroxymethyl) aminomethane, sodium chloride, sucrose, magnesium chloride hexahydrate, EDTA disodium salt dihydrate, polysorbate-80, ethanol 95%, and water for injection.

Component II contains:

Tris (hydroxymethyl) aminomethane, sodium chloride, sucrose, magnesium chloride hexahydrate, EDTA disodium salt dihydrate, polysorbate-80, ethanol 95%, and water for injection.

## Appendix 2

### COVID-19 Severity and Symptoms

| COVID-19 Severity       | Symptoms                                                                                                                                                                                                                                                                                                                                                                                                                                                                                                                                                                                                                                                                                                                                        |
|-------------------------|-------------------------------------------------------------------------------------------------------------------------------------------------------------------------------------------------------------------------------------------------------------------------------------------------------------------------------------------------------------------------------------------------------------------------------------------------------------------------------------------------------------------------------------------------------------------------------------------------------------------------------------------------------------------------------------------------------------------------------------------------|
| Mild course             | <ul style="list-style-type: none"> <li>• Body temperature below 38. 5°C, cough, weakness, sore throat;</li> <li>• No symptoms of moderate and severe course</li> </ul>                                                                                                                                                                                                                                                                                                                                                                                                                                                                                                                                                                          |
| Moderate course         | <ul style="list-style-type: none"> <li>• Fever over 38. 5°C;</li> <li>• Respiratory rate (RR) more than 22/min;</li> <li>• Shortness of breath during physical exertion;</li> <li>• Pneumonia (confirmed by computed tomography [CT] of the lungs);</li> <li>• Oxygen saturation level &lt; 95%;</li> <li>• C-reactive protein (CRP) of blood serum more than 10 mg/l</li> </ul>                                                                                                                                                                                                                                                                                                                                                                |
| Severe course           | <ul style="list-style-type: none"> <li>• RR more than 30/min;</li> <li>• Oxygen saturation level ≤ 93%;</li> <li>• Oxygen partial pressure/inspiratory oxygen fraction ≤ 300 mmHg;</li> <li>• Progression of changes in the lungs according to X-ray, CT, ultrasonography (U/S) (increase in the volume of changes in the lungs by more than 50% after 24-48 hours);</li> <li>• Decreased level of consciousness, agitation;</li> <li>• Unstable hemodynamics (systolic blood pressure less than 90 mm Hg or diastolic blood pressure less than 60 mm Hg, diuresis less than 20 mL/hr);</li> <li>• Arterial blood lactate &gt; 2 mmol/l;</li> <li>• More than 2 points on the Sequential Organ Failure Assessment Scale (SOFA) scale</li> </ul> |
| Extremely severe course | <ul style="list-style-type: none"> <li>• ARF with the need for respiratory support (invasive mechanical ventilation);</li> <li>• Septic shock;</li> <li>• Multiple organ failure;</li> <li>• Changes in the lungs on CT (X-ray) typical of a critical viral lesion (lesion volume is significant or subtotal; 4 CT) or an evidence of ARDS</li> </ul>                                                                                                                                                                                                                                                                                                                                                                                           |

Appendix 3

Table S1. Seroconversion rate and statistic data (geometric mean and 95% CI of geometric mean) of RBD-specific antibodies at day 42, as measured by ELISA, in participants immunized with vaccine (n=342) or placebo (n=114). Data are divided into groups by age and sex of volunteers, and data are provided for the total data for vaccine and placebo groups.

|                         | Age strata (years) |                     |                    |                    |                   |                   |                   |                   |                    |                   | total               | Placebo           | Vaccine |
|-------------------------|--------------------|---------------------|--------------------|--------------------|-------------------|-------------------|-------------------|-------------------|--------------------|-------------------|---------------------|-------------------|---------|
|                         | 18-30              |                     | 31-40              |                    | 41-50             |                   | 51-60             |                   | 60+                |                   |                     |                   |         |
|                         | Female             | Male                | Female             | Male               | Female            | Male              | Female            | Male              | Female             | Male              |                     |                   |         |
| Number of values        | 14                 | 14                  | 35                 | 44                 | 45                | 47                | 39                | 45                | 26                 | 29                | 114                 | 342               |         |
| Seroconversion rate, %  | 100                | 100                 | 100                | 100                | 97.78             | 97.87             | 97.44             | 97.78             | 96.15              | 96.55             | 14.91               | 98.25             |         |
| Geometric mean (95% CI) | 18102 (7689-42616) | 22067 (11971-40676) | 10925 (6807-17532) | 10106 (7047-14494) | 7940 (4874-12935) | 6123 (3658-10250) | 8063 (4715-13789) | 7129 (4466-11379) | 10908 (5462-21785) | 8128 (4071-16228) | 30.55 (20.18-46.26) | 8996 (7610-10635) |         |

Table S2. Seroconversion rate and statistic data (geometric mean and 95% CI of geometric mean) of NtAb at day 42 in participants immunized with vaccine (n=72) or placebo (n=28), as measured by microneutralization assay. Data are divided into groups by age and sex of volunteers, and data are provided for the total data for vaccine and placebo groups.

|                           | Age strata (years) |        |       |        |        | Total | Placebo | Vaccine | Sex    |      |
|---------------------------|--------------------|--------|-------|--------|--------|-------|---------|---------|--------|------|
|                           | 18-30              | 31-40  | 41-50 | 51-60  | 60+    |       |         |         | Female | Male |
| Number of values          | 7                  | 15     | 22    | 21     | 7      | 28    | 72      | 26      | 46     |      |
| Seroconversion rate, %    | 85.71              | 100.00 | 90.91 | 100.00 | 100.00 | 7.14  | 95.83   | 96.15   | 95.65  |      |
| Geometric mean            | 53.84              | 72.94  | 48.32 | 28.75  | 36.23  | 1.562 | 44.47   | 48.21   | 42.49  |      |
| Lower 95% CI of geo. mean | 8.198              | 44.25  | 22.21 | 16.71  | 13.21  | 1.117 | 31.79   | 25.51   | 28.42  |      |
| Upper 95% CI of geo. mean | 353.5              | 120.2  | 105.1 | 49.49  | 99.35  | 2.185 | 62.2    | 91.08   | 63.51  |      |

Table S3. Statistic data (median, 25% and 75% percentile, 95%CI, Mean) of antigen-specific PBMC cell IFN $\gamma$  production at day of vaccination and day 28, as measured by ELISA, in participants injected with Gam-COVID-Vac or placebo.

|                         | Vaccine            |                    |              |                    |  | Placebo            |                    |              |                    |
|-------------------------|--------------------|--------------------|--------------|--------------------|--|--------------------|--------------------|--------------|--------------------|
|                         | Before vaccination |                    | 28 day       |                    |  | Before vaccination |                    | 28 day       |                    |
|                         | unstimulated       | antigen stimulated | unstimulated | antigen stimulated |  | unstimulated       | antigen stimulated | unstimulated | antigen stimulated |
| Number of values        | 44                 | 44                 | 44           | 44                 |  | 14                 | 14                 | 14           | 14                 |
| 25% Percentile          | 0.229              | 0.251              | 0.129        | 13.940             |  | 0.169              | 0.192              | 0.099        | 0.116              |
| Median                  | 0.498              | 0.439              | 0.432        | 32.770             |  | 0.408              | 0.547              | 0.475        | 0.410              |
| 75% Percentile          | 0.697              | 0.650              | 0.875        | 50.760             |  | 0.621              | 0.674              | 0.804        | 0.856              |
| 95% CI of median        |                    |                    |              |                    |  |                    |                    |              |                    |
| Actual confidence level | 95.12%             | 95.12%             | 95.12%       | 95.12%             |  | 98.71%             | 98.71%             | 98.71%       | 98.71%             |
| Lower confidence limit  | 0.300              | 0.336              | 0.220        | 21.640             |  | 0.130              | 0.170              | 0.099        | 0.096              |
| Upper confidence limit  | 0.639              | 0.538              | 0.634        | 40.940             |  | 0.708              | 0.708              | 0.847        | 0.952              |
| Mean                    | 0.483              | 0.473              | 1.072        | 46.360             |  | 0.432              | 0.482              | 0.454        | 0.476              |

Table S4. Serious adverse events by MedDRA system organ class and preferred term at any time during the study, in randomised participants who received at least one dose of vaccine

| SAE list                                                        | Vaccine Gam-COVID-Vac<br>N=16427 |                 |                   | Placebo<br>N=5435  |                 |                   |
|-----------------------------------------------------------------|----------------------------------|-----------------|-------------------|--------------------|-----------------|-------------------|
|                                                                 | Number of subjects               | Number of cases | % of all subjects | Number of subjects | Number of cases | % of all subjects |
| <b>System and organ class and preferred term ( MedDRA 23.1)</b> |                                  |                 |                   |                    |                 |                   |
| <b>Subjects with any serious adverse event</b>                  | 45                               | 47              | 0.274             | 23                 | 23              | 0.423             |
| <b>Vascular Disorders</b>                                       | 10                               | 10              | 0.061             | 3                  | 3               | 0.055             |
| Deep Vein Thrombosis                                            | 1                                | 1               | 0.006             | 0                  | 0               | 0.000             |
| Disorder of regulation of the autonomic nervous system          | 1                                | 1               | 0.006             | 0                  | 0               | 0.000             |
| Hemorrhagic stroke                                              | 0                                | 0               | 0.000             | 1                  | 1               | 0.018             |
| Hypertension                                                    | 1                                | 1               | 0.006             | 0                  | 0               | 0.000             |
| Transient ischemic attack                                       | 1                                | 1               | 0.006             | 0                  | 0               | 0.000             |
| Hypertensive crisis                                             | 2                                | 2               | 0.012             | 0                  | 0               | 0.000             |
| Cerebral circulation failure                                    | 1                                | 1               | 0.006             | 0                  | 0               | 0.000             |
| Vascular encephalopathy                                         | 1                                | 1               | 0.006             | 0                  | 0               | 0.000             |
| Vertebrobasilar insufficiency                                   | 0                                | 0               | 0.000             | 1                  | 1               | 0.018             |
| Acute myocardial infarction                                     | 2                                | 2               | 0.012             | 1                  | 1               | 0.018             |
| <b>Infections and invasions</b>                                 | 8                                | 8               | 0.049             | 14                 | 14              | 0.258             |
| COVID-19                                                        | 2                                | 2               | 0.012             | 11                 | 11              | 0.202             |
| Appendicitis                                                    | 1                                | 1               | 0.006             | 0                  | 0               | 0.000             |
| Acute sinusitis                                                 | 1                                | 1               | 0.006             | 0                  | 0               | 0.000             |
| Upper Respiratory Tract Infection                               | 1                                | 1               | 0.006             | 0                  | 0               | 0.000             |
| Extremity abscess                                               | 1                                | 1               | 0.006             | 0                  | 0               | 0.000             |
| Bacterial pneumonia                                             | 0                                | 0               | 0.000             | 1                  | 1               | 0.018             |
| Viral bronchitis                                                | 1                                | 1               | 0.006             | 0                  | 0               | 0.000             |
| Complicated appendicitis                                        | 0                                | 0               | 0.000             | 2                  | 2               | 0.037             |
| Jaw abscess                                                     | 1                                | 1               | 0.006             | 0                  | 0               | 0.000             |
| <b>Reproductive system and breast disorders</b>                 | 3                                | 3               | 0.018             | 2                  | 2               | 0.037             |

|                                                             |   |   |       |   |   |       |
|-------------------------------------------------------------|---|---|-------|---|---|-------|
| Prostatitis                                                 | 2 | 2 | 0·012 | 1 | 1 | 0·018 |
| Dysfunctional Uterine Bleeding                              | 0 | 0 | 0·000 | 1 | 1 | 0·018 |
| Pain in the epididymis                                      | 1 | 1 | 0·006 | 0 | 0 | 0·000 |
| <b>Heart Disorders</b>                                      | 4 | 6 | 0·024 | 1 | 1 | 0·018 |
| Atrial fibrillation                                         | 3 | 5 | 0·018 | 1 | 1 | 0·018 |
| Chest pain                                                  | 1 | 1 | 0·006 | 0 | 0 | 0·000 |
| <b>Injury, intoxication and complications of procedures</b> | 6 | 6 | 0·037 | 0 | 0 | 0·000 |
| Bacterial food poisoning                                    | 1 | 1 | 0·006 | 0 | 0 | 0·000 |
| Ankle fracture                                              | 1 | 1 | 0·006 | 0 | 0 | 0·000 |
| Brain concussion                                            | 1 | 1 | 0·006 | 0 | 0 | 0·000 |
| Humerus fracture                                            | 1 | 1 | 0·006 | 0 | 0 | 0·000 |
| Fracture of the thoracic vertebra                           | 1 | 1 | 0·006 | 0 | 0 | 0·000 |
| Alcohol poisoning                                           | 1 | 1 | 0·006 | 0 | 0 | 0·000 |
| <b>Gastrointestinal disorders</b>                           | 4 | 4 | 0·024 | 0 | 0 | 0·000 |
| Diverticulum perforation                                    | 1 | 1 | 0·006 | 0 | 0 | 0·000 |
| Pancreatitis                                                | 1 | 1 | 0·006 | 0 | 0 | 0·000 |
| Abdominal pain                                              | 2 | 2 | 0·012 | 0 | 0 | 0·000 |
| <b>Kidney and urinary tract disorders</b>                   | 2 | 2 | 0·012 | 0 | 0 | 0·000 |
| Renal colic                                                 | 1 | 1 | 0·006 | 0 | 0 | 0·000 |
| Renal abscess                                               | 1 | 1 | 0·006 | 0 | 0 | 0·000 |
| <b>Liver and biliary tract disorders</b>                    | 3 | 3 | 0·018 | 0 | 0 | 0·000 |
| Acute cholecystitis                                         | 1 | 1 | 0·006 | 0 | 0 | 0·000 |
| Sphincter of Oddi dysfunction                               | 1 | 1 | 0·006 | 0 | 0 | 0·000 |
| Biliary colic                                               | 1 | 1 | 0·006 | 0 | 0 | 0·000 |
| <b>Immune System Disorders</b>                              | 1 | 1 | 0·006 | 0 | 0 | 0·000 |
| Hypersensitivity                                            | 1 | 1 | 0·006 | 0 | 0 | 0·000 |
| <b>Muscle, skeletal and connective tissue disorders</b>     | 1 | 1 | 0·006 | 0 | 0 | 0·000 |
| Back pathology                                              | 1 | 1 | 0·006 | 0 | 0 | 0·000 |

|                                                              |   |   |       |   |   |       |
|--------------------------------------------------------------|---|---|-------|---|---|-------|
| <b>General disorders and reactions at the injection site</b> | 1 | 1 | 0·006 | 0 | 0 | 0·000 |
| Medical Device Infection                                     | 1 | 1 | 0·006 | 0 | 0 | 0·000 |
| <b>Pregnancy, the puerperium and perinatal conditions</b>    | 0 | 0 | 0·000 | 1 | 1 | 0·018 |
| Spontaneous abortion                                         | 0 | 0 | 0·000 | 1 | 1 | 0·018 |
| <b>Respiratory, Chest and Mediastinal Disorders</b>          | 0 | 0 | 0·000 | 1 | 1 | 0·018 |
| Interstitial lung disease                                    | 0 | 0 | 0·000 | 1 | 1 | 0·018 |
| <b>Nervous System Disorders</b>                              | 2 | 2 | 0·012 | 1 | 1 | 0·018 |
| Recurrence of multiple sclerosis                             | 0 | 0 | 0·000 | 1 | 1 | 0·018 |
| Vestibular Ataxia                                            | 1 | 1 | 0·006 | 0 | 0 | 0·000 |
| Syncope                                                      | 1 | 1 | 0·006 | 0 | 0 | 0·000 |



Table S5. Rare adverse events by MedDRA system organ class and preferred term in randomised participants who received two doses. AEs registered in <0.1% of volunteers

|                                                     |                                                           | Vaccine<br>N = 9258* |         | Placebo<br>N = 3038* |         |
|-----------------------------------------------------|-----------------------------------------------------------|----------------------|---------|----------------------|---------|
|                                                     |                                                           | N cases              | % cases | N cases              | % cases |
| Skin and subcutaneous tissue disorders [10040785]   | Acneform dermatitis [10012432]                            | 1                    | 0.011   | 0                    | 0.000   |
|                                                     | Allergic skin reaction [10001729]                         | 1                    | 0.011   | 0                    | 0.000   |
|                                                     | Allergic rash [10001717]                                  | 5                    | 0.054   | 1                    | 0.033   |
|                                                     | Alopecia [10001760]                                       | 2                    | 0.022   | 0                    | 0.000   |
|                                                     | Itching [10037087], Itching of the upper limbs [10079579] | 4                    | 0.043   | 5                    | 0.165   |
|                                                     | Skin rash [10040913]                                      | 9                    | 0.097   | 5                    | 0.165   |
|                                                     | Petechial rash [10034756]                                 | 1                    | 0.011   | 0                    | 0.000   |
|                                                     | Rash [10037844]                                           | 3                    | 0.032   | 0                    | 0.000   |
|                                                     | Eczema [10014200]                                         | 1                    | 0.011   | 0                    | 0.000   |
| Disorder of the organ of vision [10015919]          | Eyeball pain [10015906]                                   | 1                    | 0.011   | 0                    | 0.000   |
|                                                     | Dry eye [10015921]                                        | 0                    | 0.000   | 2                    | 0.066   |
|                                                     | Macular and posterior pole degeneration [10025405]        | 1                    | 0.011   | 0                    | 0.000   |
|                                                     | Cataract [10007739]                                       | 0                    | 0.000   | 1                    | 0.033   |
|                                                     | Keratoconjunctivitis [10023348]                           | 1                    | 0.011   | 0                    | 0.000   |
|                                                     | Blurred field of vision [10005886]                        | 1                    | 0.011   | 0                    | 0.000   |
|                                                     | Tearing [10043171]                                        | 1                    | 0.011   | 1                    | 0.033   |
|                                                     | Disorder of vision [10047516]                             | 1                    | 0.011   | 0                    | 0.000   |
|                                                     | Chalazion [10020377]                                      | 1                    | 0.011   | 0                    | 0.000   |
| Reproductive system and breast disorders [10038604] | Vaginitis [10046950]                                      | 1                    | 0.011   | 0                    | 0.000   |
|                                                     | Prolonged erection [10068039]                             | 1                    | 0.011   | 0                    | 0.000   |
|                                                     | Corpus luteum cyst [10011116]                             | 1                    | 0.011   | 0                    | 0.000   |
|                                                     | Disorder of the menstrual cycle [10013236]                | 1                    | 0.011   | 0                    | 0.000   |
| Kidney and urinary tract disorders [10038359]       | Pain in the kidney area [10056691]                        | 1                    | 0.011   | 0                    | 0.000   |
|                                                     | Colic, renal [10009885]                                   | 1                    | 0.011   | 1                    | 0.033   |
|                                                     | Nocturia [10029446]                                       | 1                    | 0.011   | 0                    | 0.000   |
|                                                     | Exacerbation of cystitis [10011785]                       | 1                    | 0.011   | 0                    | 0.000   |
|                                                     | Frequent urination [10027562]                             | 2                    | 0.022   | 2                    | 0.066   |
| Mental disorders [10037175]                         | Lack of concentration [10027348]                          | 1                    | 0.011   | 0                    | 0.000   |
|                                                     | Decreased libido [10024419]                               | 1                    | 0.011   | 0                    | 0.000   |
|                                                     | Drowsiness [10041014]                                     | 1                    | 0.011   | 0                    | 0.000   |
| Vascular disorders [10047065]                       | Left-sided deep vein thrombosis [10024105]                | 1                    | 0.011   | 0                    | 0.000   |
|                                                     | Superficial thrombophlebitis of the leg [10042557]        | 0                    | 0.000   | 1                    | 0.033   |
| Nervous                                             | Metallic taste [10043135]                                 | 3                    | 0.032   | 0                    | 0.000   |

|                                                                                |                                                                                |    |       |   |       |
|--------------------------------------------------------------------------------|--------------------------------------------------------------------------------|----|-------|---|-------|
| system disorders [10029205]                                                    | Paresthesia [10033775]                                                         | 1  | 0·011 | 1 | 0·033 |
| Immune system disorders [10021428]                                             | Allergic reaction [10001718]                                                   | 14 | 0·151 | 3 | 0·099 |
|                                                                                | Local allergic reaction to adhesives [10076376]                                | 4  | 0·043 | 1 | 0·033 |
| Infections and invasions [10021881]                                            | Gastroenteritis [10017888]                                                     | 0  | 0·000 | 1 | 0·033 |
|                                                                                | Herpes [10019944], Herpes virus infection [10019971], Labial herpes [10019942] | 8  | 0·086 | 4 | 0·132 |
|                                                                                | Otitis [10033071]                                                              | 2  | 0·022 | 0 | 0·000 |
|                                                                                | Pyelonephritis [10037596]                                                      | 1  | 0·011 | 0 | 0·000 |
| Metabolic and nutritional disorders [10027433]                                 | Dyslipidemia [10058108]                                                        | 1  | 0·011 | 0 | 0·000 |
|                                                                                | Decreased appetite [10003020]                                                  | 1  | 0·011 | 0 | 0·000 |
| Benign, malignant and unspecified neoplasms (incl.cysts and polyps) [10029104] | Benign neoplasm of the eyelid [10063707]                                       | 1  | 0·011 | 0 | 0·000 |
| Hearing and labyrinth disorders [10013993]                                     | Noise in ears [10014018]                                                       | 1  | 0·011 | 1 | 0·033 |
| Blood and lymphatic system disorders [10005329]                                | Axillary lymphadenitis [10050824], Axillary lymph node enlargement [10003875]  | 6  | 0·065 | 1 | 0·033 |

\*Data obtained from volunteers who received both doses of vaccine based on analysis performed at database lock on 11/18/2020. The total number of volunteers at the time of database lock is 12296, including 9258 in vaccine group and 3038 in placebo group.

During the analysis of rare adverse events in the vaccine group, 91 AEs were identified, of which 82 grade 1 (90,1%), 9 grade 2 (9,9%); in the placebo group, 31 AEs were identified, of which 29 were grade 1 (93,5%), 2 grade 2 (6,5%).

Grades were determined according to next documents:

- Guidance for Industry. Toxicity Grading Scale for Healthy Adult and Adolescent Volunteers Enrolled in Preventive Vaccine Clinical Trials. U.S. Department of Health and Human Services, September 2007.
- Common Terminology Criteria for Adverse Events (CTCAE) Version 5.0, U.S. Department of Health and Human Services, November 2017.

Table S6. Demographic and anthropometric characteristics of volunteers 60+ years (Number of volunteers (%) or Mean±SD)

| Index                                                                                                                                      | Group             |                 |
|--------------------------------------------------------------------------------------------------------------------------------------------|-------------------|-----------------|
|                                                                                                                                            | Vaccine           | Placebo         |
| Total number                                                                                                                               | 1611 (100·0%)     | 533 (100·0%)    |
| Age                                                                                                                                        |                   |                 |
| 60-69                                                                                                                                      | 1318 (81·8%)      | 456 (85·6%)     |
| 70-79                                                                                                                                      | 265 (16·4%)       | 71 (13·3%)      |
| 80+                                                                                                                                        | 28 (1·8%)         | 6 (1·1%)        |
| Sex                                                                                                                                        |                   |                 |
| Female                                                                                                                                     | 704 (43·7%)       | 221 (41·5%)     |
| Male                                                                                                                                       | 907 (56·3%)       | 312 (58·5%)     |
| Ethnicity                                                                                                                                  |                   |                 |
| White                                                                                                                                      | 1601 (99·4%)      | 531 (99·6%)     |
| Asian                                                                                                                                      | 9 (0·6%)          | 2 (0·4%)        |
| Other                                                                                                                                      | 1 (0·1%)          | 0 (0·0%)        |
|                                                                                                                                            |                   |                 |
| Age· years                                                                                                                                 | 65·7±4·5          | 65·3±4·2        |
| Body weight· kg                                                                                                                            | 81·6±15·6         | 82·1±15·7       |
| Height· cm                                                                                                                                 | 169·9±8·9         | 170·8±9·2       |
| BMI· kg / m2                                                                                                                               | 27·94±4·17        | 27·98±4·25      |
|                                                                                                                                            |                   |                 |
| The presence of concomitant diseases (Diabetes mellitus, hypertension, ischemic heart disease, obesity and others)*                        |                   |                 |
| No                                                                                                                                         | 857/1611 (53·2%)  | 287/533 (53·8%) |
| Yes                                                                                                                                        | 754/1611 (46·8%)  | 246/533 (46·2%) |
|                                                                                                                                            |                   |                 |
| Risk of infection in volunteers*                                                                                                           |                   |                 |
| High**                                                                                                                                     | 1/1582 (0·1%)     | 3/526 (0·6%)    |
| Medium **                                                                                                                                  | 370/1582 (23·4%)  | 119/526 (22·6%) |
| General**                                                                                                                                  | 1211/1582 (76·5%) | 404/526 (76·8%) |
|                                                                                                                                            |                   |                 |
| * The data on the number of volunteers from the total number in the group for which there is a description of this parameter are presented |                   |                 |
| ** High risk - work involves interaction with patients with a confirmed diagnosis of COVID-19                                              |                   |                 |
| Medium risk - professional contact with a large number of people (general practitioners· social workers· shop assistants, etc.)            |                   |                 |
| General risk - no additional risks associated with professional activities                                                                 |                   |                 |

Table S7. Adverse events registered during the analyzed period and noted in 0.3% or more subjects over 60 years old in the Vaccine/Placebo group, by classes of organ systems, preferred terms and groups

|                           | Vaccine<br>N = 1029 |                   | Placebo<br>N = 340 |                   |
|---------------------------|---------------------|-------------------|--------------------|-------------------|
|                           | Number of subjects  | % of all subjects | Number of subjects | % of all subjects |
| Flu-like illness          | 156                 | 15.2              | 30                 | 8.8               |
| Local reaction            | 56                  | 5.4               | 4                  | 1.2               |
| Asthenia                  | 26                  | 2.5               | 9                  | 2.6               |
| Injection site reaction   | 5                   | 0.5               | 1                  | 0.3               |
| Malaise                   | 5                   | 0.5               | 2                  | 0.6               |
| Pyrexia                   | 5                   | 0.5               | 1                  | 0.3               |
| Fever sensation           | 4                   | 0.4               | 1                  | 0.3               |
| Hypertension              | 40                  | 3.9               | 10                 | 2.9               |
| Headache                  | 30                  | 2.9               | 9                  | 2.6               |
| Tonsillitis               | 8                   | 0.8               | 0                  | 0.0               |
| Cough                     | 10                  | 1.0               | 1                  | 0.3               |
| Rhinorrhea                | 7                   | 0.7               | 4                  | 1.2               |
| Nasal congestion          | 5                   | 0.5               | 2                  | 0.6               |
| Contact dermatitis        | 39                  | 3.8               | 3                  | 0.9               |
| Diarrhea                  | 8                   | 0.8               | 1                  | 0.3               |
| Nausea                    | 7                   | 0.7               | 3                  | 0.9               |
| Dyspepsia                 | 5                   | 0.5               | 0                  | 0.0               |
| Abdominal discomfort      | 3                   | 0.3               | 1                  | 0.3               |
| Elevated body temperature | 23                  | 2.2               | 3                  | 0.9               |
| Myalgia                   | 9                   | 0.9               | 3                  | 0.9               |
| Arthralgia                | 4                   | 0.4               | 1                  | 0.3               |

Table S8. Efficacy against moderate/severe COVID-19 cases at different time points after dose 1

| <b>Efficacy Against moderate/severe COVID-19</b> |                       |                                |                                |                                      |         |
|--------------------------------------------------|-----------------------|--------------------------------|--------------------------------|--------------------------------------|---------|
| First moderate/severe COVID-19 Occurrence        |                       |                                |                                |                                      |         |
| Timeframe                                        | Total number of cases | Vaccine N cases (N volunteers) | Placebo N cases (N volunteers) | Vaccine efficacy (95% CI) 100x(1-OR) | P value |
| From 1 to 7 days after dose 1                    | 10                    | 7 (16427)                      | 3 (5435)                       | 22,8 (0.0-78.6)                      | 0,7174  |
| From 8 to 14 days after dose 1                   | 7                     | 4 (15269)                      | 3 (5091)                       | 55,5 (0.0-88.1)                      | 0,3771  |
| From 15 to 21 days after dose 1                  | 9                     | 4 (14999)                      | 5 (4950)                       | 73,6 (13.1-91.9)                     | 0,0476  |
| After 21 days after dose 1                       | 20                    | 0 (14964)                      | 20 (4902)                      | 100 (94.4-100.0)                     | <0.0001 |

## Appendix 4

### A detailed description of the condition of volunteers with fatal COVID-19

The first COVID-19 fatal subject has developed symptoms 4 days after receiving the first dose of vaccine. After 3 days of self home treatment using antipyretic (NSAIDs) drugs without informing clinicians, subject was hospitalized with viral pneumonia verified by CT and COVID-19 test. During hospitalization, in addition to hypertension with a predominant heart lesion without heart failure, diagnosed at the outpatient screening stage, the subject after a comprehensive instrumental examination revealed advanced chronic concomitant diseases not identified at the screening stage and that were unawareable for patient, such as hepatomegaly and fatty hepatitis (by CT and ultrasound scans). Echocardiography revealed left ventricular hypertrophy with dilatation of the left atrium and thickening of the ascending aorta and of the aortic and mitral valves. During 10 days of hospitalization the condition remained stably severe, with the progression of viral lung lesions on CT, the development of acute respiratory distress syndrome and multiple organ failure. On the day 16 the development of hypercoagulable syndrome with occlusion of the left popliteal artery and left leg arteries, myocardial ischemia in the posterior wall of the left ventricle and an episode of ventricular tachycardia, stopped by electro-pulse therapy, led to a subsequent sudden and progressive deterioration of the condition without effect from cardiopulmonary resuscitation.

The second subject, also fatal from COVID-19, became ill (self-diagnosed) on the 5th day after receiving the first dose of the vaccine. After 7 days of self home treatment using antipyretic (NSAIDs) drugs without informing clinicians, subject was hospitalized with viral pneumonia verified by CT and COVID-19 test. Comprehensive additional examination diagnosed a severe comorbid background not identified at medical examination and that were unawareable for patient (in addition to non-insulin dependent diabetes mellitus type II, hypertension with predominantly heart disease without heart failure, obesity alimentary-constitutional genesis of I degree): coronary heart disease, postinfarction cardiosclerosis after a previous myocardial infarction, diabetic angiopathy of the lower limbs, cholelithiasis, chronic calculous cholecystitis were revealed. In the hospital, decompensation of diabetes mellitus was diagnosed on the background of severe viral pneumonia and therapy with systemic glucocorticosteroids, as well as a worsening of the course of arterial hypertension and the appearance of signs of heart failure, which could have a negative effect on the course of the disease as a whole and on its outcome. Moreover, signs of acute respiratory distress syndrome were growing, multiple organ failure progressed, laboratory and instrumental data did not exclude the development of repeated myocardial infarction, the development of thromboembolic syndrome against the background of hypercoagulable syndrome, the development of pulmonary and cerebral edema, which led to death.

## Appendix 5

## Supplementary Authors List – Gam-COVID-Vac Vaccine Trial Group

|                                  |                                                                                                                                                                                                                    |
|----------------------------------|--------------------------------------------------------------------------------------------------------------------------------------------------------------------------------------------------------------------|
| Alexey I Hripun, MD, DSci        | Moscow Healthcare Department, Moscow, Russia                                                                                                                                                                       |
| Andrey V Starshinin, MD, PhD     | Moscow Healthcare Department, Moscow, Russia                                                                                                                                                                       |
| Yulia O Antipova, MD,            | Moscow Healthcare Department, Moscow, Russia                                                                                                                                                                       |
| Andrey A Tyazhelnikov, MD, PhD   | State Budgetary Healthcare Institution «Consultation and Diagnosis Polyclinic No. 121», Moscow Healthcare Department, Moscow, Russia                                                                               |
| Natalya A Markova, MD,           | State Budgetary Healthcare Institution «Municipal Polyclinic No. 220», Moscow Healthcare Department, Moscow, Russia                                                                                                |
| Natalya N Schindryaeva, MD, DSci | State Budgetary Healthcare Institution «Municipal Polyclinic No. 2», Moscow Healthcare Department, Moscow, Russia                                                                                                  |
| Pavel V Gulyaev, MD, PhD         | State budgetary institution of health care of the city of Moscow «Diagnostic center No. 5 with polyclinic Department» Moscow Healthcare Department, Moscow, Russia                                                 |
| Elena Y Tikhanovskaya, MD, PhD   | State budgetary institution of health care of the city of Moscow «City polyclinic No. 36» Moscow Healthcare Department, Moscow, Russia                                                                             |
| Petr V Pershin, MD               | State Budgetary Healthcare Institution «Municipal Polyclinic No. 62» Moscow Healthcare Department, Moscow, Russia                                                                                                  |
| Alexander N Tsybin, MD           | State Budgetary Healthcare Institution «Research Institute of organization and medical management», Moscow Healthcare Department, Moscow, Russia                                                                   |
| Andrey G Komarov                 | State Budgetary Healthcare Institution «Diagnostics center (Center of the laboratory testing) », Moscow Healthcare Department, Moscow, Russia                                                                      |
| Natalya A Rusantsova, MD         | Moscow Healthcare Department, Moscow, Russia                                                                                                                                                                       |
| Ekaterina S Kucheryavikh         | The Government of Moscow, Moscow, Russia                                                                                                                                                                           |
| Yulia N Karpova                  | The Government of Moscow, Moscow, Russia                                                                                                                                                                           |
| Yana S Panarina                  | The Government of Moscow, Moscow, Russia                                                                                                                                                                           |
| Evgenia A Tsareva                | The Government of Moscow, Moscow, Russia                                                                                                                                                                           |
| Vadim V Tarasov                  | Federal State Autonomous Educational Institution of Higher Education I.M. Sechenov First Moscow State Medical University of the Ministry of Health of the Russian Federation (Sechenov University), Moscow, Russia |

## Appendix 6

### List of participating sites:

1. State budgetary institution of health care of the city of Moscow "City polyclinic No. 220 of the Department of health care of the city of Moscow", 123022, Moscow
2. State budgetary institution of health care of the city of Moscow "City polyclinic No. 62 of the Department of health care of the city of Moscow", 125167
3. State budgetary institution of health care of the city of Moscow "City Clinical Hospital named after M.P. Konchalovsky Department of Health of the City of Moscow ", 124489, Moscow
4. State budgetary institution of health care of the city of Moscow "City polyclinic No. 2 of the Department of health of the city of Moscow", 117556
5. State Budgetary Institution of Health of the City of Moscow "City Polyclinic No. 212 of the Department of Healthcare of the City of Moscow", 119620
6. State Budgetary Healthcare Institution of the City of Moscow "Consultative and Diagnostic Polyclinic No. 121 of the Moscow City Health Department", 117042, Moscow
7. State Budgetary Institution of Healthcare of the City of Moscow "M.E. Zhadkevich of the Moscow City Health Department ", 121374, Moscow
8. Joint Stock Company "Group of Companies "Medsi ", 123056, Moscow
9. State budgetary healthcare institution of the city of Moscow "City Clinical Hospital No. 52 of the Moscow City Health Department", 123182, Moscow
10. Limited Liability Company NEARMEDIC PLUS, 125252, Moscow
11. Branch of the limited liability company Hadassah Medical LTD, 151059, Moscow
12. State budgetary institution of health care of the city of Moscow "City polyclinic № 6 of the Department of health of the city of Moscow", 127206, Moscow
13. State Budgetary Healthcare Institution of the City of Moscow "City Polyclinic No. 170 of the Moscow City Health Department", 117545, Moscow
14. State budgetary institution of health care of the city of Moscow "Diagnostic center No. 5 with an outpatient department of the Department of Health of the city of Moscow", 127572, Moscow
15. State budgetary institution of health care of the city of Moscow "City polyclinic № 46 of the Department of health of the city of Moscow", 105064, Moscow
16. State budgetary institution of health care of the city of Moscow "City polyclinic № 36 of the Department of health of the city of Moscow", 109652, Moscow
17. State budgetary institution of health care of the city of Moscow "City Polyclinic No. 68 of the Department of Healthcare of the City of Moscow", 119180, Moscow

18. State Budgetary Healthcare Institution of the City of Moscow "Diagnostic Clinical Center No. 1 of the Moscow City Health Department", 117485, Moscow
19. Limited Liability Company "Clinic of New Medical Technologies ARCHIMED V" (LLC "Clinic ARCHIMED V"), 119261, Moscow
20. State budgetary institution of health care of the city of Moscow "City polyclinic № 109 of the Department of health of the city of Moscow", 109548, Moscow
21. State Budgetary Institution of Health of the City of Moscow "City Polyclinic No. 219 of the Department of Healthcare of the City of Moscow", 123480, Moscow
22. State budgetary institution of health care of the city of Moscow "City polyclinic No. 115 of the Department of health care of the city of Moscow", 123308, Moscow
23. State Budgetary Institution of Healthcare of the City of Moscow "City Polyclinic No. 210 of the Department of Healthcare of the City of Moscow", 115211, Moscow
24. State budgetary institution of health care of the city of Moscow "City polyclinic № 175 of the Department of health of the city of Moscow", 105568, Moscow
25. State budgetary institution of health care of the city of Moscow "City polyclinic № 64 of the Department of health of the city of Moscow", 107023, Moscow
